# Supplementary material for: Removal of arsenic from smelting wastewater using Fe3O4as anin situFe source: the effect of pre-dissolution and the evolution process of scorodite
Source: Royal Society of Chemistry journal article supplement (doi:10.1039/d2ew00333c), 2022-01-01
Supplement: d2ew00333c1.pdf [file d2ew00333c1.pdf]

1  
2  
3  
4  
5  
6  
7  
8  
9  
10  
11  
12  
13  
14  
15  
16  
17  
18  
19  
20  
21  
22  
23  
24

**Supporting information**

**Removal of arsenic from smelting wastewater using Fe<sub>3</sub>O<sub>4</sub> as an situ Fe source:  
the effect of pre-dissolution and the evolution process of scorodite**

Guohua Li, Xianjin Qi<sup>a\*</sup>, Jiahao Shi, Guizhi Yan, Heng Wang, Aimin Zhang

State Key Laboratory of Complex Nonferrous Metal Resources Clean Utilization,  
Faculty of Metallurgical and Energy Engineering, Kunming University of Science and  
Technology, Kunming, 650093, China

\*Corresponding author  
Xianjin Qi, qixianjin\_1@163.com

## 25 S1. Temperature dependence

26 The reaction temperature affects the scorodite synthesis. Combined with previous  
27 studies, we took the temperature from 23°C to 90 °C. According to Fig. S1a-c, with the  
28 increase of reaction temperature, the residual As concentration in the solution gradually  
29 decreases, the As removal rate gradually increases, and the toxic leaching gradually  
30 decreases. When the reaction temperature was 90 °C, the As removal rate reached up to  
31 99.1%. At the same time, scorodite was generated when the reaction temperature was  
32  $\geq 80^\circ\text{C}$  (Fig. S1d). At the same time, according to the research of Cai et al.[1], when the  
33 temperature was  $>90^\circ\text{C}$ , the As removal rate will not change greatly. Therefore, finally,  
34 we choose the reaction temperature of 90°C as the best experimental condition.

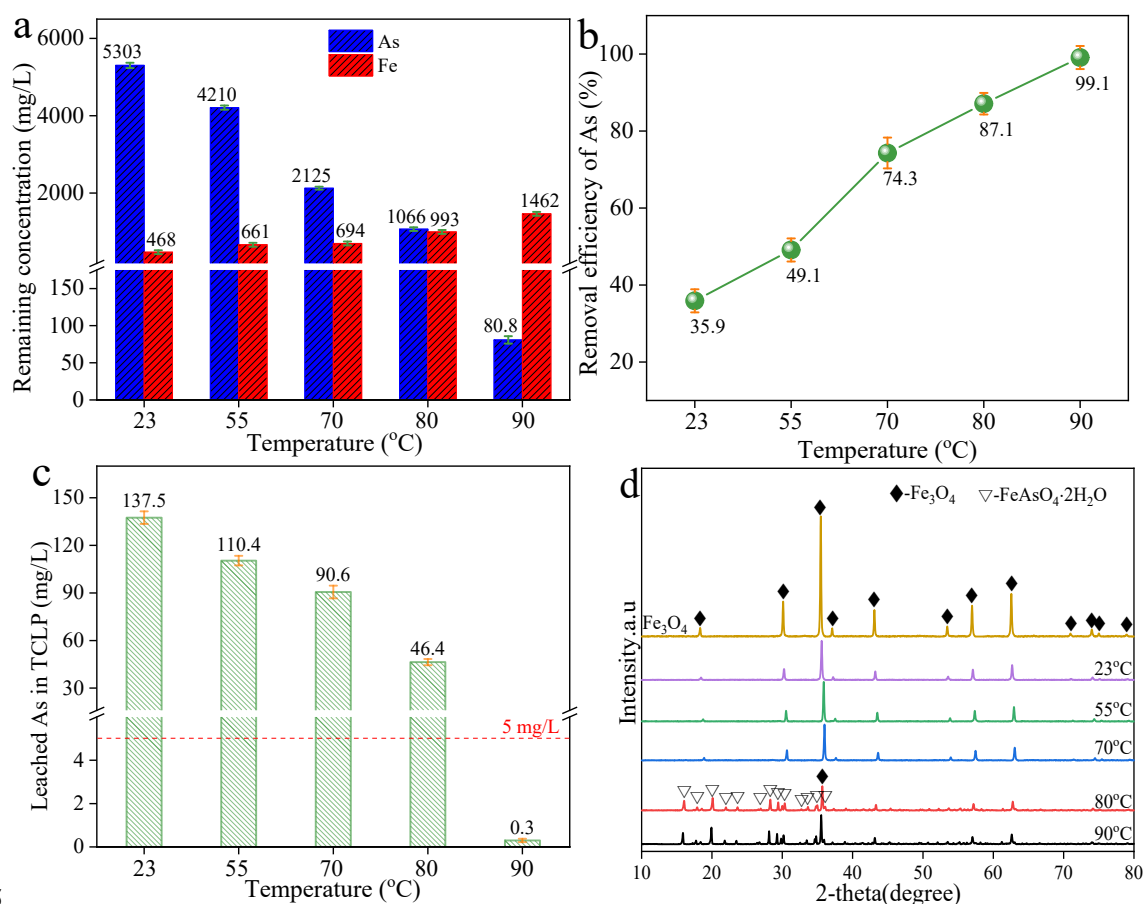

35  
36 Fig. S1. (a) As and Fe concentrations in the residual solution, and (b) removal rate of

37 As, (c) TCLP (the dashed red line is the national standard), (d) XRD patterns of the  
 38 precipitates at different temperatures (Experimental conditions: predissolution time=2  
 39 h; Fe/As molar rate=3:1; reaction time=24 h; pH values=2.5).

40

41 Our proposed process was compared with others reported in literature, as shown in  
 42 Table S1. Generally, high temperature was required for the scorodite synthesis. In the  
 43 reaction of liquid iron source, it was difficult to control a low Fe and As supersaturation  
 44 to produce high-crystallization scorodite. Compared with the liquid iron source process,  
 45 our process can overcome these shortcomings. The release of Fe ion from solid iron  
 46 source could react with As(V) in the form of scorodite. Meanwhile, the Fe<sub>3</sub>O<sub>4</sub> could  
 47 neutralize H<sup>+</sup> in the wastewater, providing a stable pH for the crystallization of  
 48 scorodite. Additionally, the As removal rate of Fe<sub>3</sub>O<sub>4</sub> was higher and less toxic leaching  
 49 than that of limonite.

50 **Table S1** Comparison in terms of operational parameters between this study and  
 51 previously available studies.

| Methods          | wastewater composition                            | Iron sources                      | Reaction condition                          | As removal efficiency | Residual As concentration | TCLP (mg/L) |
|------------------|---------------------------------------------------|-----------------------------------|---------------------------------------------|-----------------------|---------------------------|-------------|
| Liquid source[2] | iron<br>pH=0.7<br>C <sub>As</sub> =2500<br>0 mg/L | Fe(NO <sub>3</sub> ) <sub>3</sub> | pH=0.73<br>Fe/As=1<br>T=160 °C<br>Time=24 h | 92                    | 2000 mg/L                 | <5          |
| Solid source[3]  | iron<br>pH=0.9<br>C <sub>As</sub> =10300          | Limonite                          | pH=1.5<br>Fe/As=4                           | 96.2                  | 389 mg/L                  | 2.3         |

|                |          |                                          |                                |                                           |      |           |     |
|----------------|----------|------------------------------------------|--------------------------------|-------------------------------------------|------|-----------|-----|
|                |          | mg/L                                     |                                | T=90 °C<br>Time=12 h                      |      |           |     |
| Our<br>process | proposed | pH=0.8<br>C <sub>As</sub> =10300<br>mg/L | Fe <sub>3</sub> O <sub>4</sub> | pH=2.5<br>Fe/As=3<br>T=90 °C<br>Time=24 h | 99.1 | 80.8 mg/L | 0.3 |

52

### 53 **References**

54 [1] G. Cai, X. Zhu, K. Li, X. Qi, Y. Wei, H. Wang, F. Hao, Self-enhanced and efficient  
55 removal of arsenic from waste acid using magnetite as an in situ iron donator, Water  
56 Res, 157 (2019) 269-280.

57 [2] G.P. Demopoulos, D.J. Droppert, G.V. Weert, Precipitation of crystalline scorodite  
58 (FeAsO<sub>4</sub> · 2H<sub>2</sub>O) from chloride solutions, Hydrometallurgy, 38 (1995) 245-261.

59 [3] X. Li, G. Cai, Y. Li, X. Zhu, X. Qi, X. Zhang, B. Shu, K. Li, Y. Wei, H. Wang,  
60 Limonite as a source of solid iron in the crystallization of scorodite aiming at arsenic  
61 removal from smelting wastewater, Journal of Cleaner Production, 278 (2021) 123552.

62
